# Supplementary material for: Amphiphilic copolymers change the nature of the ordered-to-disordered phase transition of lipid membranes from discontinuous to continuous
Source: Royal Society of Chemistry journal article supplement (doi:10.1039/c9cp01293a), 2019-01-01
Supplement: c9cp01293a1.pdf [file c9cp01293a1.pdf]

# Amphiphilic copolymers change the nature of the ordered-to-disordered phase transition of lipid membranes from discontinuous to continuous<sup>†</sup>

Afroditi Maria Zaki\* and Paola Carbone

## Supplementary Information

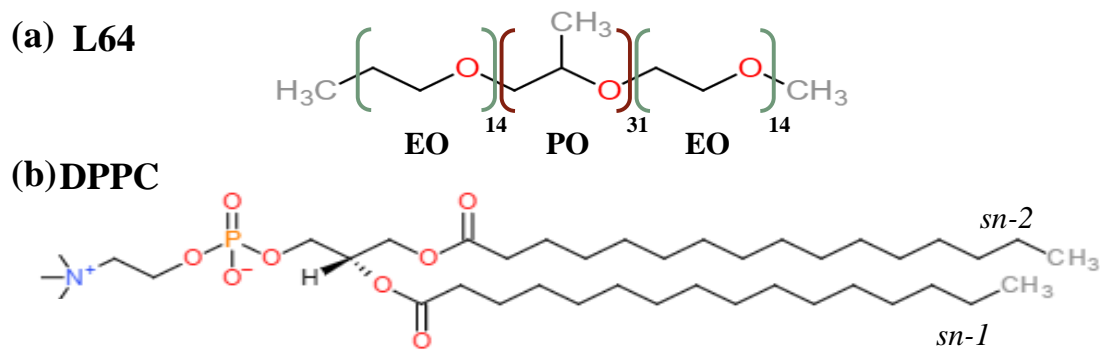

**Fig. S1** (a) Molecular structure of the L64 Pluronic. The blocks in parentheses highlight the ethylene oxide (EO) (green) and the propylene oxide (PO) (red) segments. (b) Molecular structure of the DPPC lipid.

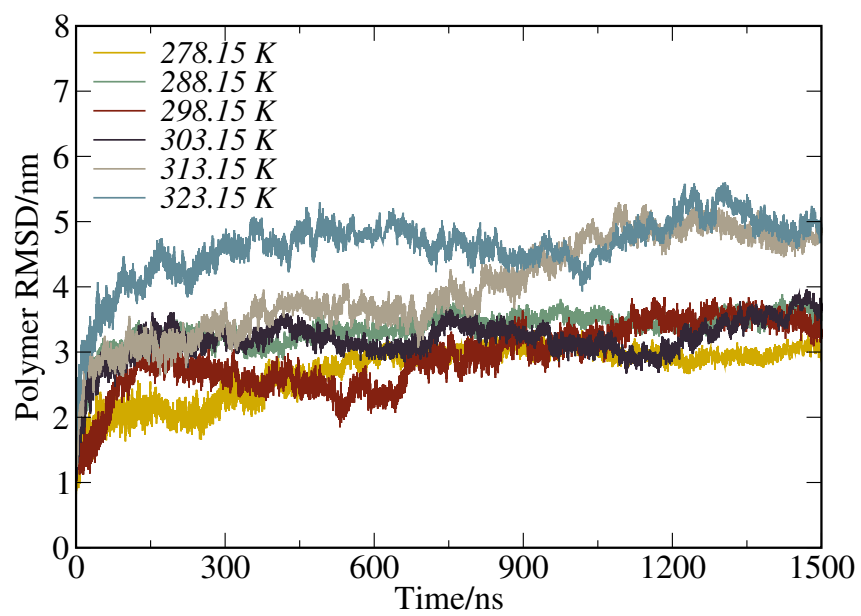

**Fig. S2** Root mean square deviation (RMSD) of the L64 chains for selected temperatures.

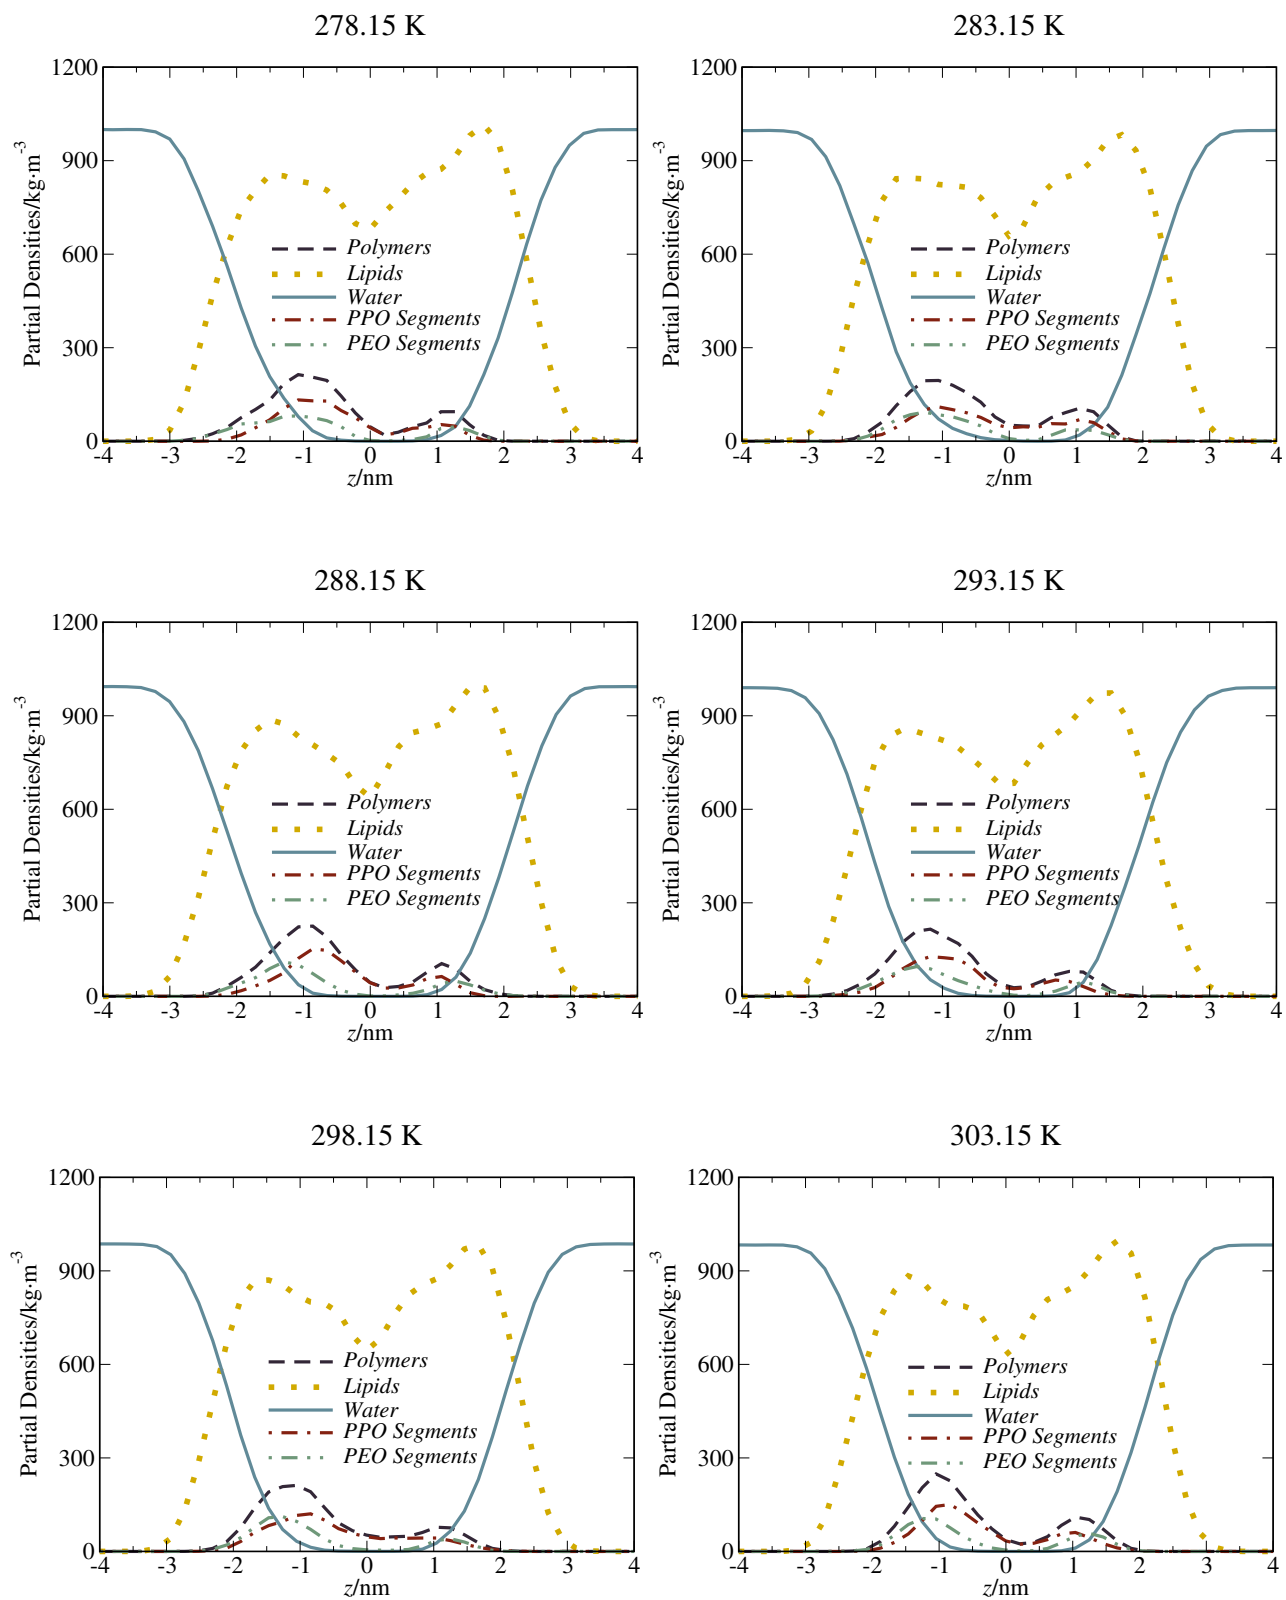

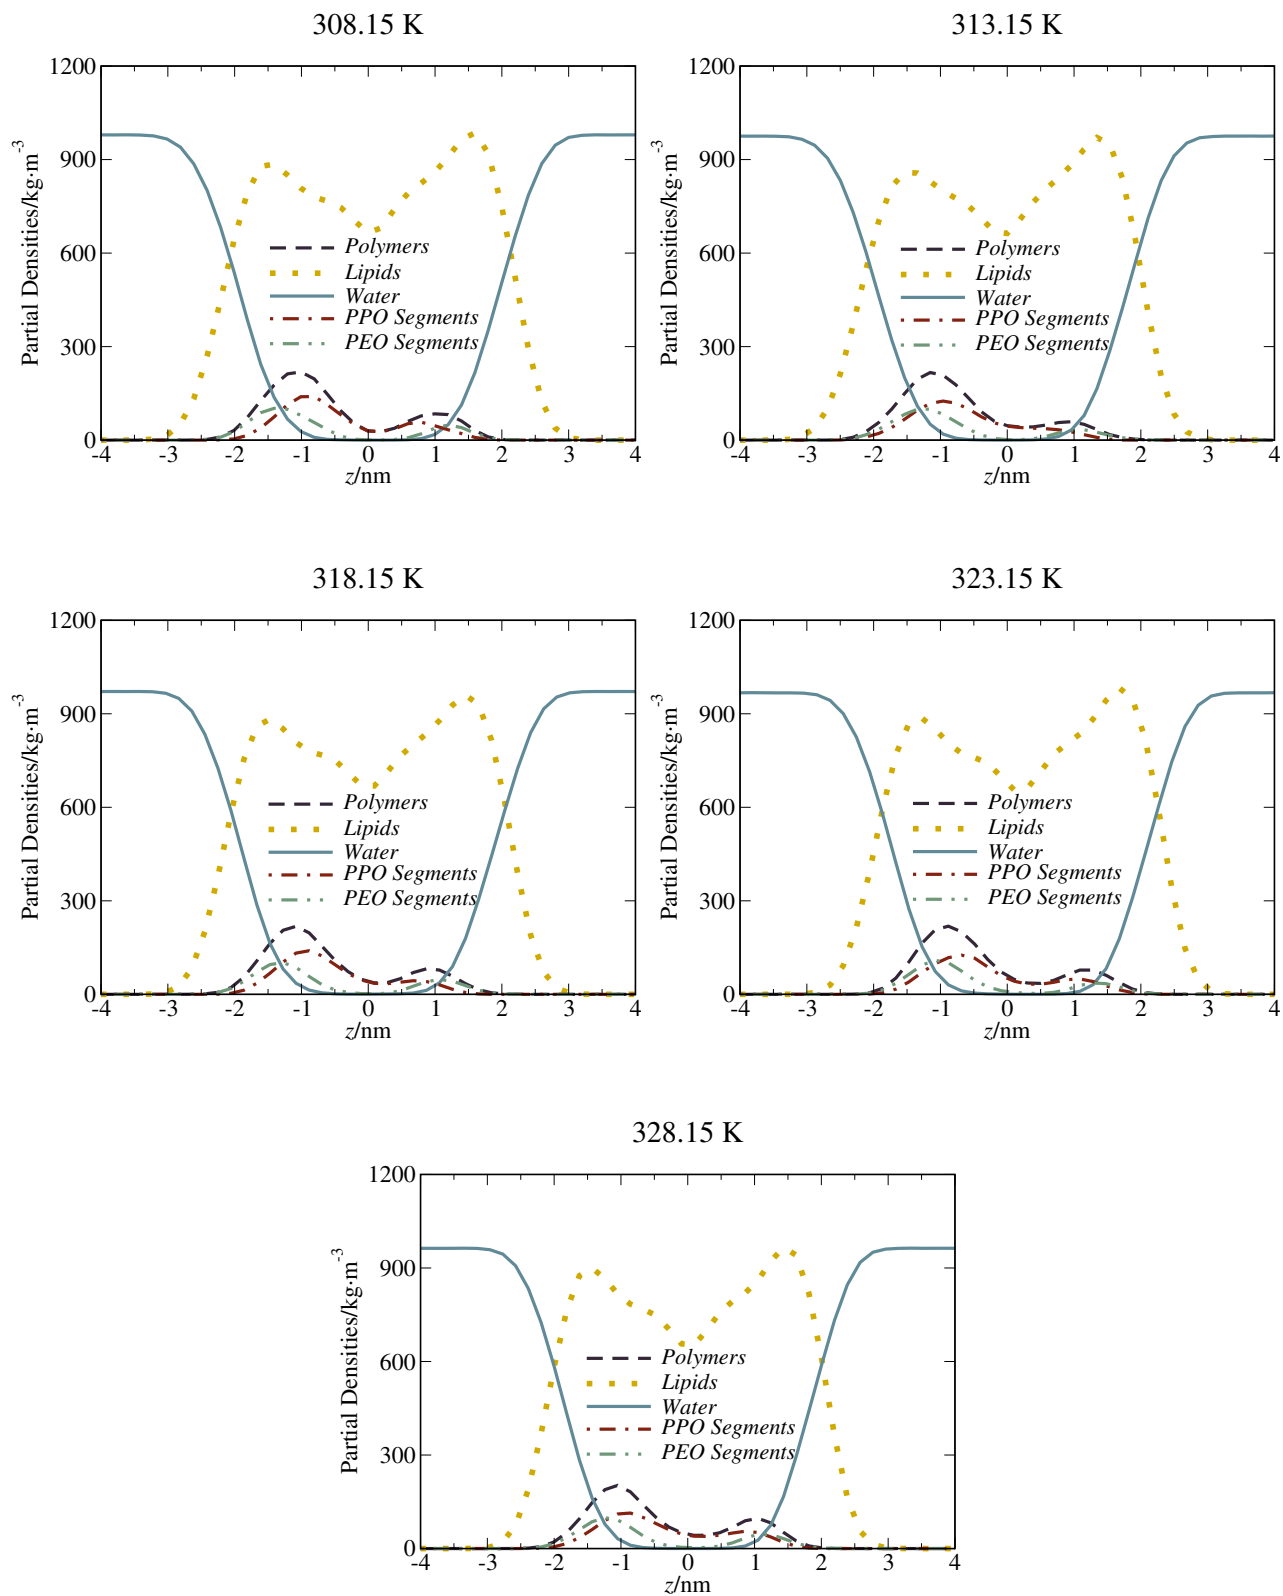

**Fig. S3** Mass density profiles of all the system components of the *hybrid* membranes in all the studied temperatures, averaged over the final 50 ns of each trajectory.

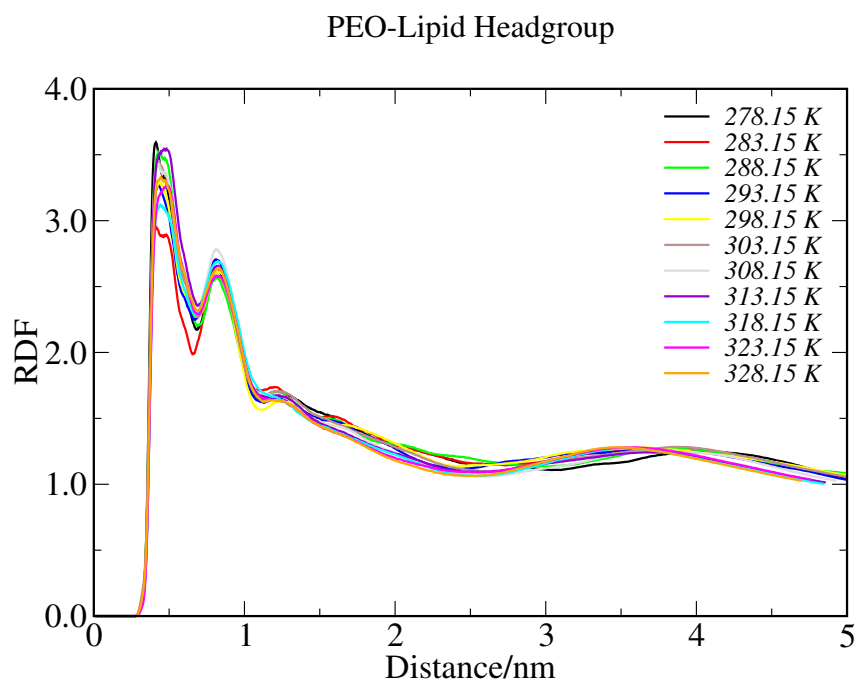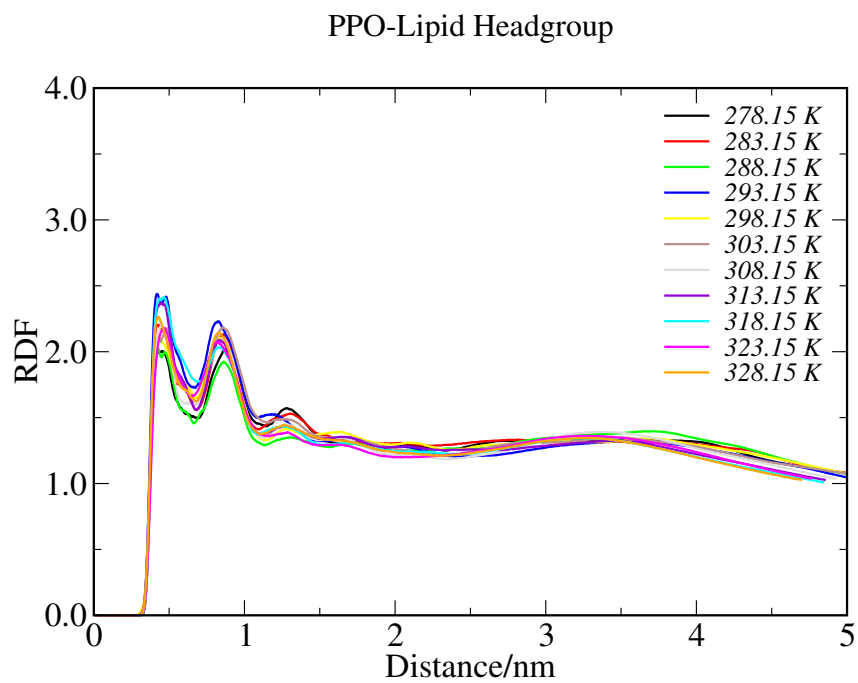

**Fig. S4** Radial distribution functions (RDF) calculated over the final 50 ns of the trajectories. *Up*: PEO-P8, *down*: PPO-P8. The RDFs were computed for the center of mass of the PEO or PPO segment of each polymer chain separately and then averaged over all the twelve chains.

**Table S1** Area per lipid ( $A_{lip}$ ) for the *pure* DPPC in all temperatures, averaged over the final 100 ns of each trajectory

| T [K]  | DPPC<br>$A_{lip}$ [nm <sup>2</sup> ] |
|--------|--------------------------------------|
| 278.15 | 0.520 ± 0.002                        |
| 283.15 | 0.528 ± 0.002                        |
| 288.15 | 0.513 ± 0.002                        |
| 293.15 | 0.526 ± 0.002                        |
| 298.15 | 0.514 ± 0.003                        |
| 303.15 | 0.567 ± 0.009                        |
| 308.15 | 0.606 ± 0.007                        |
| 313.15 | 0.617 ± 0.007                        |
| 318.15 | 0.622 ± 0.008                        |
| 323.15 | 0.631 ± 0.006                        |
| 328.15 | 0.637 ± 0.007                        |

**Table S2** Lipid lateral diffusion coefficients ( $D_{lip}$ ) for the DPPC and the DPPC/L64 membranes in all temperatures

| T [K]  | DPPC                                                        | DPPC/L64                                                    |
|--------|-------------------------------------------------------------|-------------------------------------------------------------|
|        | $D_{lip} [\times 10^{-12} \text{ m}^2 \cdot \text{s}^{-1}]$ | $D_{lip} [\times 10^{-12} \text{ m}^2 \cdot \text{s}^{-1}]$ |
| 278.15 | 0.142 ± 0.037                                               | 0.383 ± 0.099                                               |
| 283.15 | 0.123 ± 0.078                                               | 0.433 ± 0.045                                               |
| 288.15 | 0.101 ± 0.007                                               | 0.289 ± 0.094                                               |
| 293.15 | 0.096 ± 0.054                                               | 0.644 ± 0.252                                               |
| 298.15 | 0.188 ± 0.042                                               | 0.901 ± 0.346                                               |
| 303.15 | 2.553 ± 0.444                                               | 1.183 ± 0.487                                               |
| 308.15 | 4.612 ± 1.645                                               | 1.201 ± 0.300                                               |
| 313.15 | 8.812 ± 0.521                                               | 1.493 ± 0.318                                               |
| 318.15 | 5.788 ± 0.591                                               | 2.512 ± 0.767                                               |
| 323.15 | 8.853 ± 1.138                                               | 2.956 ± 1.306                                               |
| 328.15 | 12.400 ± 1.600                                              | 4.606 ± 1.204                                               |

**Table S3** Diffusion pre-exponential factors ( $D_{lip0}$ ) of the lipids in the DPPC and the DPPC/L64 membranes in the regions of low temperature and high temperature

|          | Low T Region               | High T Region              |
|----------|----------------------------|----------------------------|
|          | $D_{lip0} [\text{kJ/mol}]$ | $D_{lip0} [\text{kJ/mol}]$ |
| DPPC     | $6.8 \cdot 10^{-13}$       | $1.7 \cdot 10^{-4}$        |
| DPPC/L64 |                            | $6.4 \cdot 10^{-6}$        |
